# Supplementary material for: XOLARIS: A 24-Month, Prospective, Natural History Study of 201 Participants with Retinitis Pigmentosa GTPase Regulator-Associated X-Linked Retinitis Pigmentosa
Source: PubMed Central journal article supplement — Ophthalmol Sci. 2024 Aug 13;5(1):100595. doi: 10.1016/j.xops.2024.100595 (PMC11531613; doi:10.1016/j.xops.2024.100595), 2024-08-13
Supplement: mmc6.pdf [file mmc6.pdf]

**Fig S2. Participant Disposition**

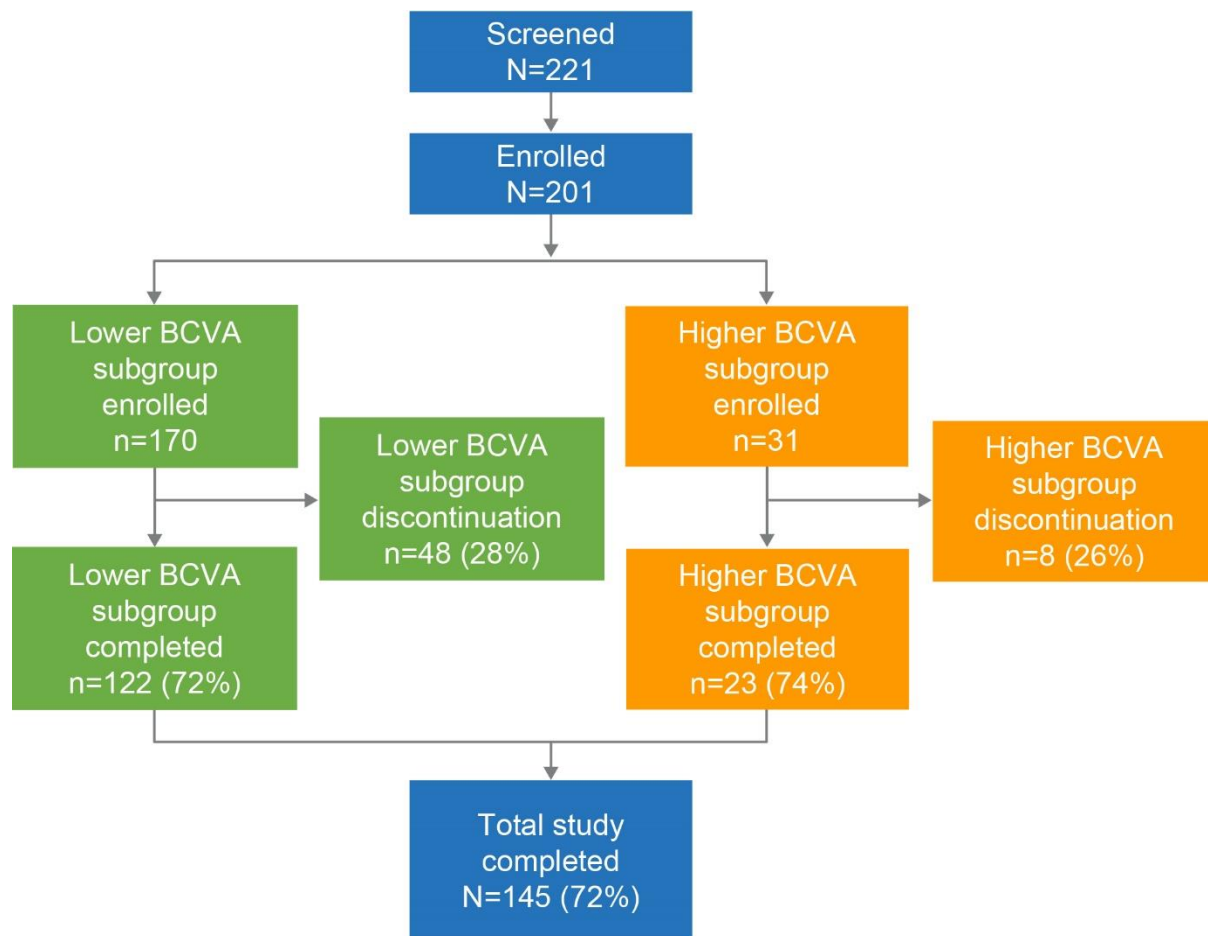

BCVA = best-corrected visual acuity

Lower BCVA subgroup = 34–73 ETDRS letters

Higher BCVA subgroup =  $\geq 74$  ETDRS letters
